# Supplementary material for: Chiral three-dimensional organic–inorganic lead iodide hybrid semiconductors
Source: Royal Society of Chemistry journal article supplement (doi:10.1039/d4sc00954a), 2024-01-01
Supplement: d4sc00954a1.pdf [file d4sc00954a1.pdf]

## Electronic Supplementary Information

### Chiral Three-Dimensional Organic-Inorganic Lead Iodide Hybrid Semiconductor

Chang-Chun Fan,<sup>a,b</sup> Cheng-Dong Liu,<sup>b</sup> Bei-Dou Liang,<sup>b</sup> Tong-Yu Ju,<sup>b</sup> Wei Wang,<sup>b</sup> Ming-Liang Jin,<sup>b</sup>  
Chao-Yang Chai,<sup>b</sup> and Wen Zhang<sup>\*b</sup>

<sup>a</sup> College of Materials Engineering, Jinling Institute of Technology, Nanjing 211169, China.

<sup>b</sup> Jiangsu Key Laboratory for Science and Applications of Molecular Ferroelectrics and School of Chemistry and Chemical Engineering, Southeast University, Nanjing 211189, China.

## Experimental Section

**Starting Materials.**  $\text{Pb}(\text{AcO})_2 \cdot 3\text{H}_2\text{O}$  (99.9%), hydroiodic acid (57% in  $\text{H}_2\text{O}$ , distilled,  $\text{H}_3\text{PO}_2$  stabilized, 99.95%), hypophosphorous acid solution (50% in  $\text{H}_2\text{O}$ ) were purchased from Macklin. 3-(1-aminoethyl)pyridine (97%), (*R*)-1-(pyridin-3-yl)ethanamine (97%), (*S*)-1-(pyridin-3-yl)ethanamine (97%), 2-(1-aminoethyl)pyridine (97%), (*R*)-1-(pyridin-2-yl)ethanamine (97%), and (*R*)-1-(pyridin-2-yl)ethanamine (97%) were purchased from Bide-Pharmatech Company Limited. All reagents were commercially available and were used as received without further purification.

### Synthesis.

**Synthesis of 3R.**  $\text{Pb}(\text{AcO})_2$  (6.83g, 18 mmol) was dissolved in 57% HI (70 mL, 25 °C) solution, stirred to clear, and then added to 3.0 mL 50%  $\text{H}_3\text{PO}_2$  solution. Then (*R*)-1-(pyridin-3-yl)ethanamine (202.8 mg, 3 mmol) was added and a red solid formed. Continue stirring and heating up to 80 °C, the red precipitate dissolved, and the solution turned yellow. The yellow solution was volatilized under constant temperature at 80 °C. Five days later, millimeter-sized red plate crystals were obtained, with a yield of about 40%. **Anal. Calcd.** for  $\text{C}_7\text{H}_{12}\text{N}_2\text{Pb}_2\text{I}_6$  (**3R**): C: 6.47%, H: 0.93%, N: 2.15%. **Found:** C: 6.63%, H: 0.77%, N: 2.10%.

**Synthesis of 3S.**  $\text{Pb}(\text{AcO})_2$  (6.83g, 18 mmol) was dissolved in 57% HI (70 mL, 25 °C) solution, stirred to clear, and then added to 3.0 mL 50%  $\text{H}_3\text{PO}_2$  solution. Then (*S*)-1-(pyridin-3-yl)ethanamine (202.8 mg, 3 mmol) was added and the solution was volatilized under constant temperature at 80 °C. Five days later, millimeter-sized red plate crystals were obtained, with a yield of about 43%. **Anal. Calcd.** for  $\text{C}_7\text{H}_{12}\text{N}_2\text{Pb}_2\text{I}_6$  (**3S**): C: 6.47%, H: 0.93%, N: 2.15%. **Found:** C: 6.60%, H: 0.75%, N: 2.09%.

**Synthesis of 3Rac.**  $\text{Pb}(\text{AcO})_2$  (6.83g, 18 mmol) was dissolved in 57% HI (70 mL, 25 °C) solution, stirred to clear, and then added to 3.0 mL 50%  $\text{H}_3\text{PO}_2$  solution. Then 1-(pyridin-3-yl)ethanamine (202.8 mg, 3 mmol) was added and the clear solution was volatilized under constant temperature at 80 °C. Five days later, millimeter-sized red plate crystals were obtained, with a yield of about 42%. **Anal. Calcd.** for  $\text{C}_7\text{H}_{12}\text{N}_2\text{Pb}_2\text{I}_6$  (**3Rac**): C: 6.47%, H: 0.93%, N: 2.15%. **Found:** C: 6.56%, H: 0.74%, N: 2.12%.

**Synthesis of 2R.** Pb(AcO)<sub>2</sub> (6.83g, 18 mmol) was dissolved in 57% HI (70 mL, 25 °C) solution, stirred to clear, and then added to 3.0 mL 50% H<sub>3</sub>PO<sub>2</sub> solution. Then (*R*)-1-(pyridin-2-yl)ethanamine (202.8 mg, 3 mmol) was added and the clear solution was evaporated at 80°C to yield red crystals.

**Synthesis of 2S.** Pb(AcO)<sub>2</sub> (6.83g, 18 mmol) was dissolved in 57% HI (70 mL, 25 °C) solution, stirred to clear, and then added to 3.0 mL 50% H<sub>3</sub>PO<sub>2</sub> solution. Then (*S*)-1-(pyridin-2-yl)ethanamine (202.8 mg, 3 mmol) was added and the clear solution was evaporated at 80°C to yield red crystals.

**Synthesis of 2Rac.** Pb(AcO)<sub>2</sub> (6.83g, 18 mmol) was dissolved in 57% HI (70 mL, 25 °C) solution, stirred to clear, and then added to 3.0 mL 50% H<sub>3</sub>PO<sub>2</sub> solution. Then 1-(pyridin-2-yl)ethanamine (202.8 mg, 3 mmol) was added and the clear solution was evaporated at 80°C to yield red crystals.

**Single crystal and PXRD measurements .** Suitable size of single-crystals of titled compounds were selected for single-crystal X-ray diffraction analysis. Crystallographic data were collected on a Rigaku Oxford Diffraction Supernova Dual Source, Cu at Zero equipped with an AtlasS2 CCD using Mo K $\alpha$  radiation and an XtaLAB Synergy R, DW system, HyPix diffractometer. Rigaku CrysAlisPro software was used to collect data, refine cell, and reduce data. SHELXL-2018 with the OLEX2 interface was used to solve the structures by direct methods. All non-hydrogen atoms were refined anisotropically. The positions of hydrogen atoms were generated geometrically. The crystal structures generated in this study have been deposited in the Cambridge Crystallographic Data Center under accession code CCDC: 2323588-2323597 can be obtained free of charge from the CCDC via [www.ccdc.cam.ac.uk/data\\_request/cif](http://www.ccdc.cam.ac.uk/data_request/cif).

### **Physical property measurements.**

IR spectra were measured on a Nicolet5700 spectrometer.

Elemental analysis (EA) of C, H, and N was performed on UNICUBE-Elementar elemental analyzer. The UV-VIS diffuse reflectance experiments of single crystal powder samples were carried out on Shimadzu UV-2600 UV-Vis absorption spectrometer equipped with ISR-2600Plus integrating sphere. The bandgap value is estimated from the Kubelka-Munk equation:

$$\alpha/S = (1-R)^2/(2R) \tag{E1}$$

where *R* is the reflectance, and  $\alpha$  and *S* are the absorption and scattering coefficients, respectively.

Circular dichroism (CD) spectra were measured using single crystal powder with a JASCO J-1500 MIF CD spectrometer at room temperature.

***I-V measurement.*** *I-V* curves were performed by a PDA FS380 Source meter. Simulated AM 1.5 G irradiation was produced by a CEL-S500/350 solar simulator (Ceaulight, 350 W) with an AM1.5 filter. The light intensity was measured and calibrated by a Si photodetector connected with a power meter (CEL-NP2000-2A, Ceaulight). A THORLABS 565 nm pigtailed laser diode (LP 565L3) was used for visible light illumination. The incident light intensity was measured by light power meter.

**CPL-sensitive direct photodetection performance measurement.** Laser diodes with wavelength of 565 nm (ML 565L3, Thorlabs) were used for light source. Circularly polarized light was obtained by a linear polarizer (Thorlabs) and a quarter-wave plate (Thorlabs). The light intensity was measured and calibrated by a Si photodetector connected with a power meter (PM100A, Thorlabs). The current signals were collected using a PDA FS380 Source meter.

(1) Anisotropy factor ( $g_{CD}$ ) is defined by:

$$g_{CD} = \frac{CD[\text{mdeg}]}{32930 \times \text{Absorbance}} = \frac{\Delta A}{\text{Absorbance}} \quad (\text{S1})$$

where  $\Delta A$  is the difference between the left-handed ( $A_L$ ) and right-handed ( $A_R$ ) absorptions of CPL ( $\Delta A = A_L - A_R$ ).

(2) Anisotropy factor ( $g_{Iph}$ ) is defined by:

$$g_{Iph} = \frac{2|I_{ph}^R - I_{ph}^L|}{I_{ph}^R + I_{ph}^L} \quad (\text{S2}) \text{ where } I_{ph}^R \text{ and } I_{ph}^L \text{ are the}$$

photocurrents under R- and L-CPL illumination, respectively).

(3) Responsivity ( $R$ ) is calculated through:

$$R_\lambda = \frac{I_p - I_d}{SP_\lambda} \quad (\text{S3})$$

(4) Detectivity ( $D^*$ ) is calculated through:

$$D^* = \frac{R_\lambda}{\sqrt{2eI_d/S}} \quad (\text{S4})$$

$S$  is the detector area with a value of  $0.003\text{cm}^2$ , and  $e$  is the quantity of electric charge with a value of  $1.602176634 \times 10^{-19}$  C.

**Computational details.** The Vienna ab initio simulation package was used for DFT calculations. The Perdew–Burke–Ernzerhof (PBE) functional within the generalized gradient approximation was employed to express the exchange-correlation interaction. Grimme’s dispersion-corrected semi-empirical DFT-D3 method was adopted to evaluate van der Waals interactions. The energy cutoff was set to 500 eV and a  $3 \times 3 \times 2$  grid of k-points was used.

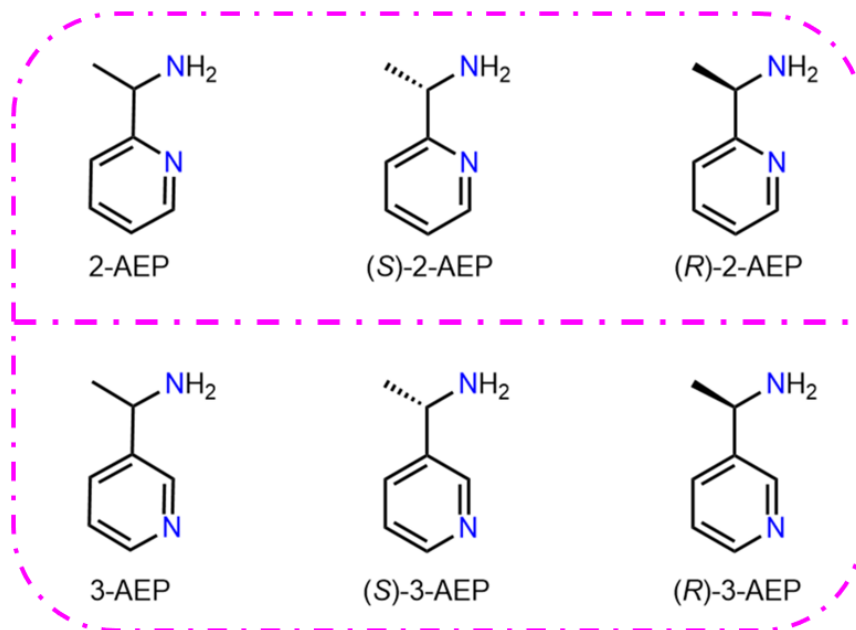

**Fig. S1** Diagram of the chiral cation used by compound **2R/S/Rac** and **3R/S/Rac**.

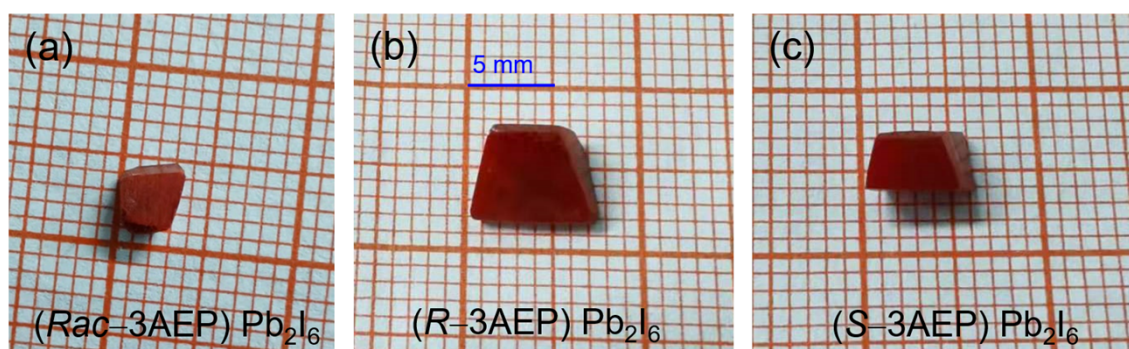

**Fig. S2** Bulk single crystals of (a) **3Rac**, (b) **3R**, and (c) **3S**.

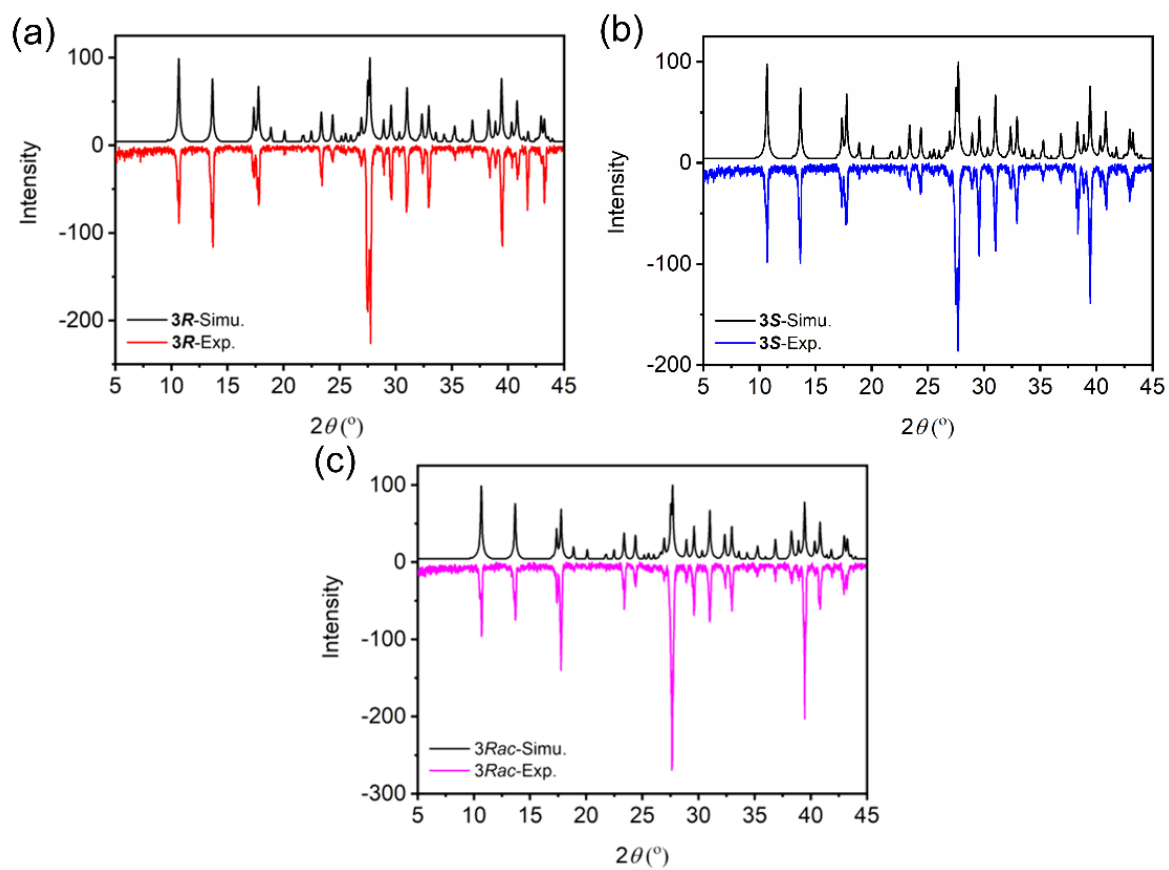

**Fig. S3** PXRD patterns of (a) **3R**, (b) **3S**, and (c) **3Rac** at 298 K.

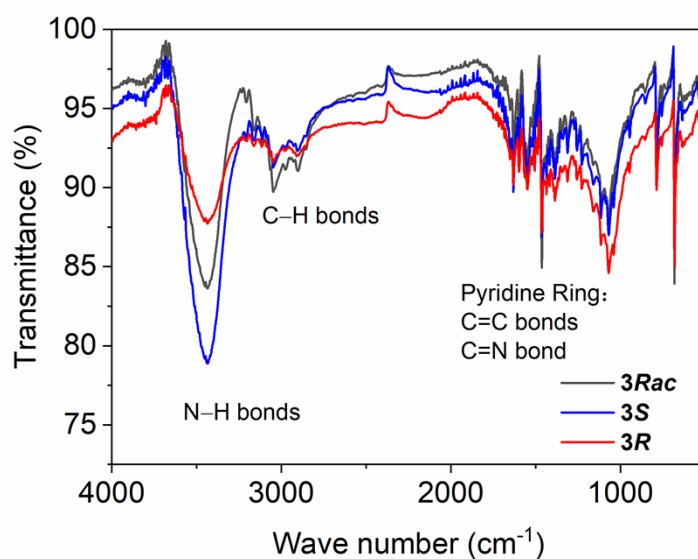

**Fig. S4** IR spectra of **3Rac/R/S** showing the spectral ranges of 500-4000  $\text{cm}^{-1}$ .

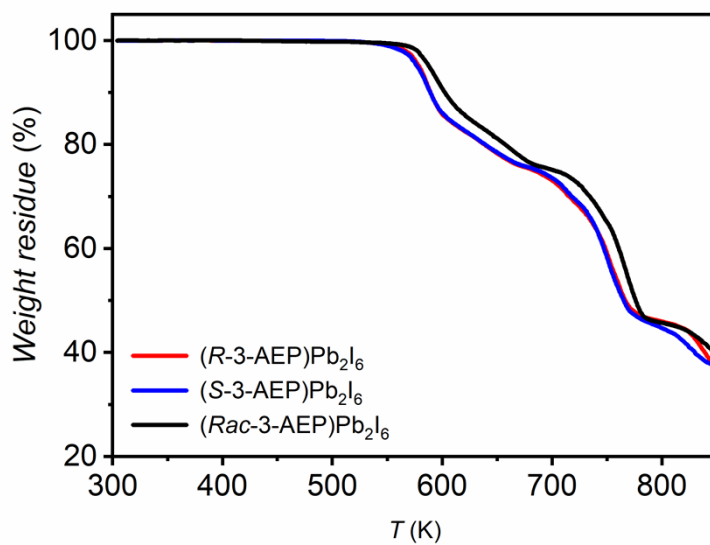

**Fig. S5** Thermogravimetric analysis (TGA) curves of **3Rac**, **3S**, and **3R** recorded on a NETZSCH TG 209F3 apparatus under air atmosphere, showing a good thermal stability up to about 575 K.

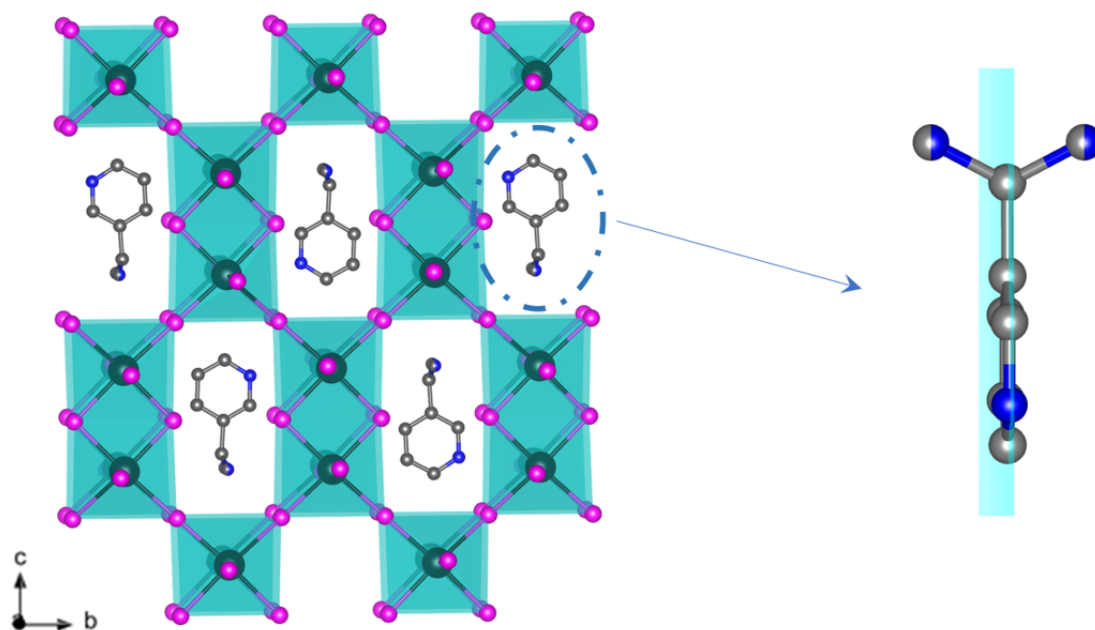

**Fig. S6** The structure of **3Rac** and **Rac-3AEP** in LTP.



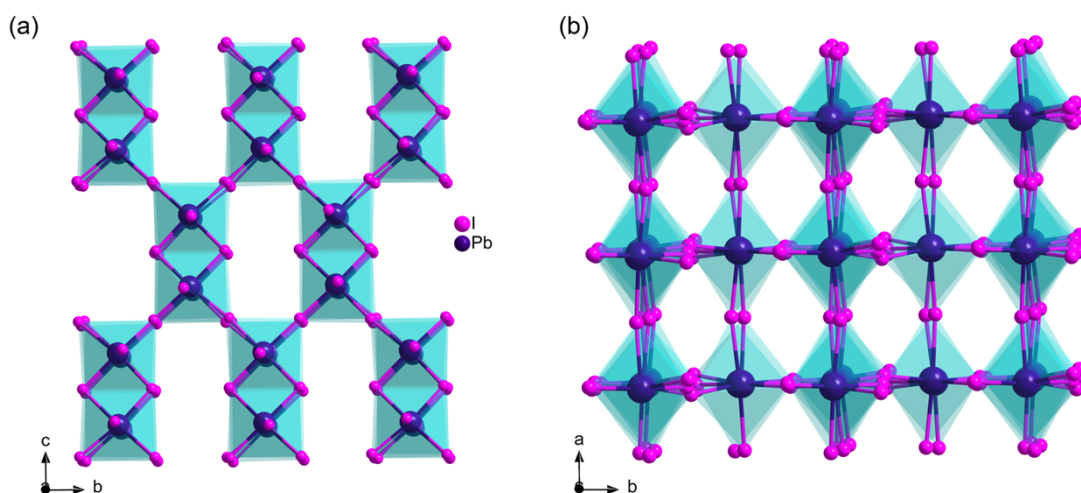

**Fig. S7** (a, b) Inorganic framework 3D connectivity. Purple, and magenta spheres represent Pb, and I, respectively.

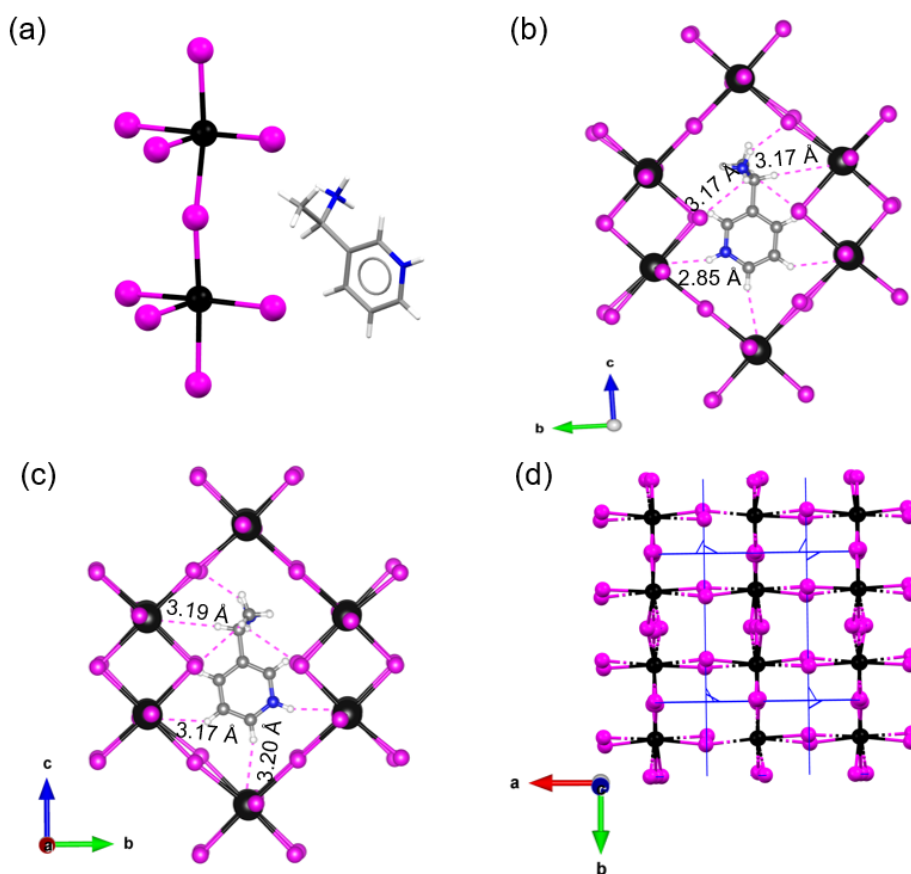

**Fig. S8** Crystal structure of **3R**. (a) Asymmetric unit of **3R** at (a) 240 K. (b, c) N–H···halogen interactions between the organic cations and inorganic layers of **3R** at 240 K. (d) Top view of the inorganic sublattice showing  $2_1$  screw axes (green) and corner-sharing octahedral bridging iodine atoms and twisted Pb–I planes along the  $a$  and  $c$  directions, respectively. Purple, and magenta spheres represent Pb, and I, respectively.

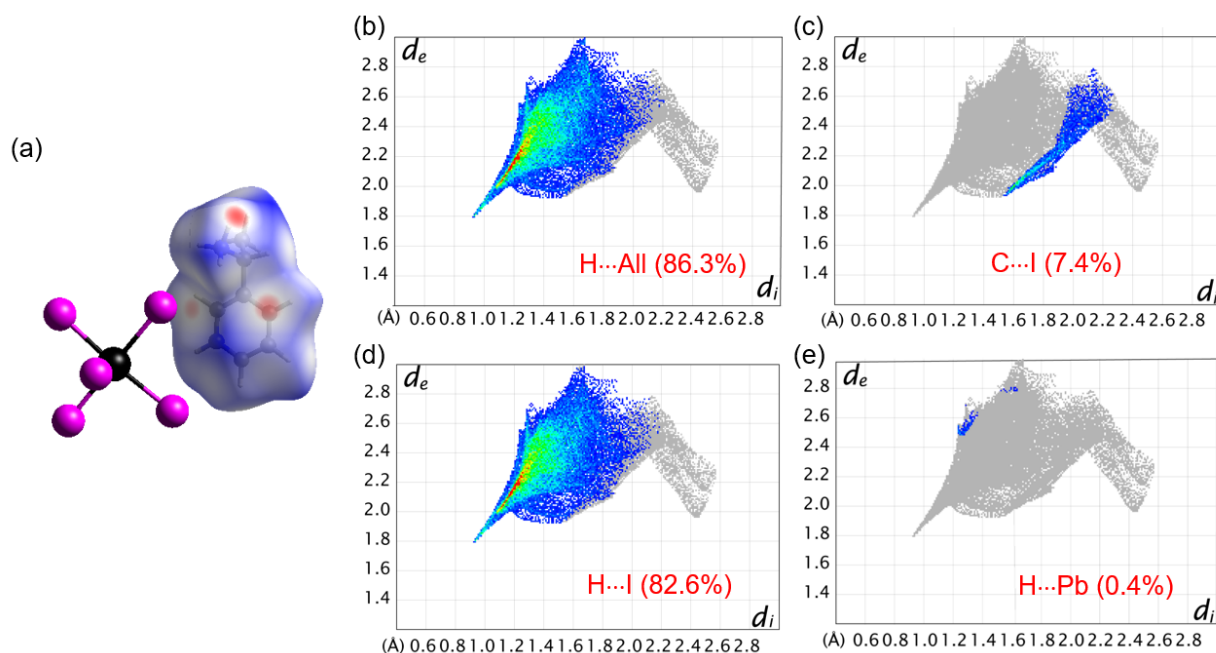

**Fig. S9** (a) 3D  $d_{\text{norm}}$  surface and (b-d) 2D fingerprint plots of **3R** at 240 K. Red, white and blue regions of the Hirshfeld surfaces indicate positive (close contact), neutral and negative isoenergies, respectively. Note: The  $d_i$  and  $d_e$  represent the distances from the Hirshfeld surface to the nearest nucleus inside (or internal,  $d_i$ ) and outside (or external,  $d_e$ ) the surface. The  $d_{\text{norm}}$  surface is the set of normalized distances for all atoms and surfaces.

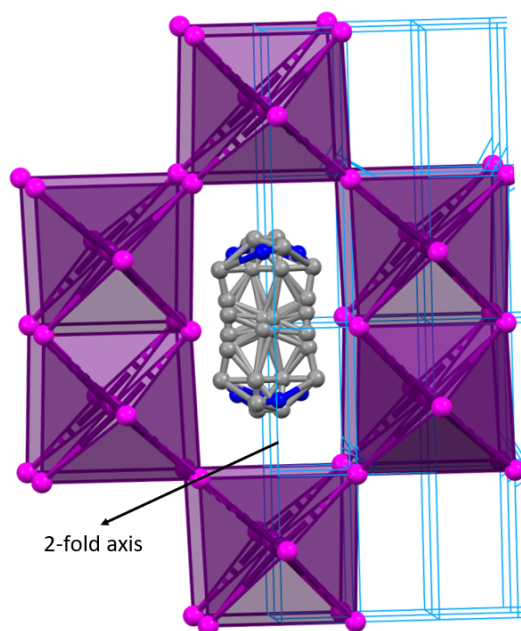

**Fig. S10** Crystal structures of **3R** at 425 K, showing the disordered 3AEP molecule with 2-fold screw axes (indigo).

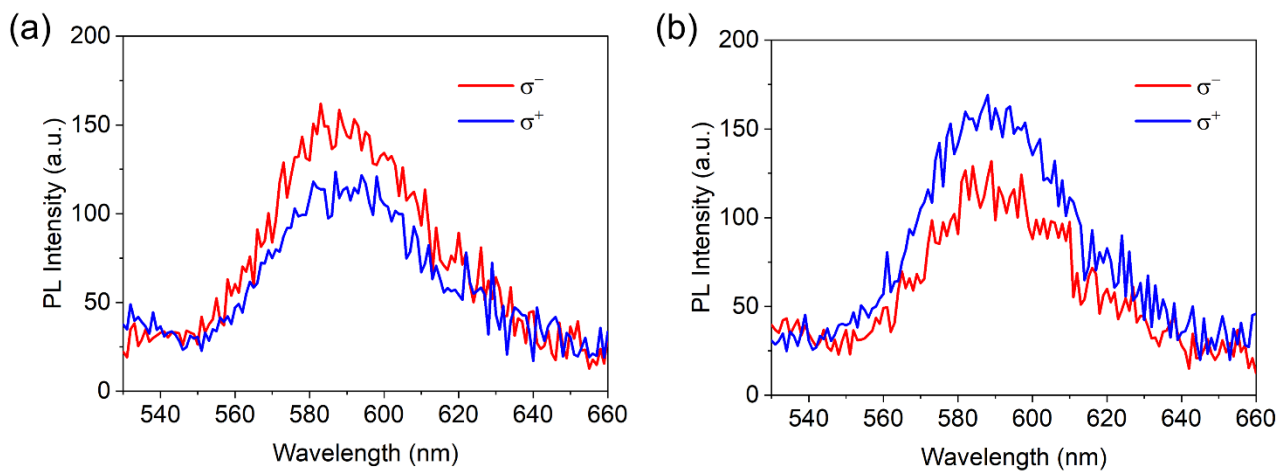

**Fig. S11** Circularly polarized light excited photoluminescence spectra of (a) **3R** and (b) **3S** upon L-CPL ( $\sigma^+$ ) and R-CPL ( $\sigma^-$ ) excitation at 510 nm and 298 K.

Table S1. Summary space groups of 3D lattices formed by dimers of metal halide octahedra

| Compound                                                                     | Crystal system | Space Group             | Ref (DOI)              |
|------------------------------------------------------------------------------|----------------|-------------------------|------------------------|
| (3AMPY)Pb <sub>2</sub> I <sub>6</sub>                                        | monoclinic     | <i>Im</i>               | 10.1021/jacs.0c00101   |
| (3AMPY)PbSnI <sub>6</sub>                                                    | monoclinic     | <i>Im</i>               | 10.1021/jacs.0c00101   |
| (4AMPY)Pb <sub>2</sub> I <sub>6</sub>                                        | monoclinic     | <i>Ia</i>               | 10.1021/jacs.0c00101   |
| (3AMPY)Sn <sub>2</sub> I <sub>6</sub>                                        | monoclinic     | <i>Im</i>               | 10.1021/jacs.0c00101   |
| (3AMPY) <sub>0.5</sub> (4AMPY) <sub>0.5</sub> Sn <sub>2</sub> I <sub>6</sub> | monoclinic     | <i>Im</i>               | 10.1021/jacs.0c00101   |
| (4AMPY)Sn <sub>2</sub> I <sub>6</sub>                                        | monoclinic     | <i>Im</i>               | 10.1021/jacs.0c00101   |
| (TMAEA)Pb <sub>2</sub> Cl <sub>6</sub>                                       | orthorhombic   | <i>Pma2</i>             | 10.1021/jacs.0c00375   |
| (dmpz)Pb <sub>2</sub> Br <sub>6</sub>                                        | orthorhombic   | <i>Pbam</i>             | 10.1002/anie.202005012 |
| (Hmpz)Pb <sub>2</sub> Br <sub>6</sub>                                        | orthorhombic   | <i>Pbam</i>             | 10.1002/anie.202005012 |
| (Hepz)Pb <sub>2</sub> Br <sub>6</sub>                                        | orthorhombic   | <i>Cmmm</i>             | 10.1002/anie.202005012 |
| (Hppz)Pb <sub>2</sub> Br <sub>6</sub>                                        | orthorhombic   | <i>Amm2</i>             | 10.1002/anie.202005012 |
| (H <sub>2</sub> apy)Pb <sub>2</sub> Br <sub>6</sub>                          | orthorhombic   | <i>Iba2</i>             | 10.1002/anie.202005012 |
| (H <sub>2</sub> dap)Pb <sub>2</sub> Br <sub>6</sub>                          | orthorhombic   | <i>Pnma</i>             | 10.1002/anie.202005012 |
| (dmpz)Pb <sub>2</sub> I <sub>6</sub>                                         | orthorhombic   | <i>Pbam</i>             | 10.1002/anie.202005012 |
| (EATMP)Pb <sub>2</sub> Br <sub>6</sub>                                       | monoclinic     | <i>Pc</i>               | 10.1021/jacs.0c09586   |
| (1,4BDA)Pb <sub>2</sub> Br <sub>6</sub>                                      | monoclinic     | <i>P2<sub>1</sub>/c</i> | 10.1021/jacs.1c11803   |
| (NMPA)Pb <sub>2</sub> Br <sub>6</sub>                                        | orthorhombic   | <i>Pba2</i>             | 10.1021/jacs.1c11803   |
| (TMEA)Pb <sub>2</sub> Br <sub>6</sub>                                        | orthorhombic   | <i>Pma2</i>             | 10.1021/jacs.1c11803   |
| (DMEA)Pb <sub>2</sub> Br <sub>6</sub>                                        | orthorhombic   | <i>Pbca</i>             | 10.1021/jacs.1c11803   |
| (M <sub>2</sub> pda)Pb <sub>2</sub> I <sub>6</sub>                           | orthorhombic   | <i>Pbam</i>             | 10.1039/d2qi01651f     |
| (Mpda)Pb <sub>2</sub> I <sub>6</sub>                                         | orthorhombic   | <i>Pbam</i>             | 10.1039/d2qi01651f     |
| (H <sub>2</sub> bda)Pb <sub>2</sub> I <sub>6</sub>                           | monoclinic     | <i>P2<sub>1</sub>/c</i> | 10.1039/d2qi01651f     |
| (NMPDA)Pb <sub>2</sub> I <sub>4</sub> Br <sub>2</sub>                        | orthorhombic   | <i>Pbam</i>             | 10.1002/sml.202305990  |
| ( <i>R</i> -3AEP)Pb <sub>2</sub> I <sub>6</sub>                              | orthorhombic   | <i>C222<sub>1</sub></i> | This work              |
| ( <i>S</i> -3AEP)Pb <sub>2</sub> I <sub>6</sub>                              | orthorhombic   | <i>C222<sub>1</sub></i> | This work              |
| ( <i>Rac</i> -3AEP)Pb <sub>2</sub> I <sub>6</sub>                            | orthorhombic   | <i>Cmca</i>             | This work              |
| ( <i>R</i> -2AEP)Pb <sub>2</sub> I <sub>6</sub>                              | orthorhombic   | <i>C222<sub>1</sub></i> | This work              |
| ( <i>S</i> -2AEP)Pb <sub>2</sub> I <sub>6</sub>                              | orthorhombic   | <i>C222<sub>1</sub></i> | This work              |
| ( <i>Rac</i> -2AEP)Pb <sub>2</sub> I <sub>6</sub>                            | orthorhombic   | <i>Cmca</i>             | This work              |

Note: 3AMPY = 3-(ammoniomethyl)pyridin-1-ium, 4AMPY = 4-(ammoniomethyl)pyridin-1-ium, Dmpz = *N,N'*-dimethylpyrazinium, Hmpz = *N*-hydro-*N'*-methylpyrazinium, Hepz = *N*-hydro-*N'*-

ethylpyrazinium, Hppz = *N*-hydro-*N'*-isopropylpyrazinium, H<sub>2</sub>apy = *N,N'*-dihydro-3-amidinopyridinium, H<sub>2</sub>dap = *N,N'*-dihydro-1,3-propanediammonium, EATMP = 2-(aminoethyl)trimethylphosphanium, 1,4BDA = 1,4-butanediammonium, NMPA = *N,N'*-dimethyl-1,3-propanediammonium, TMEA = 2-(aminoethyl)trimethylammonium, DMEA = *N,N*-dimethylethylenediammonium, M<sub>2</sub>pda = *N,N'*-dimethyl-1,3-propanediammonium, Mpda = *N*-methyl-1,3-propanediammonium, H<sub>2</sub>bda = 1,4-butylenediammonium, NMPDA = *N,N'*-dimethyl-1,3-propanediammonium, 3-AEP = 3-(1-ammonioethyl)pyridin-1-ium, 2-AEP = 2-(1-ammonioethyl)pyridin-1-ium.

**Table S2.** Selected hydrogen bonds for (*R*-3AEP)Pb<sub>2</sub>I<sub>6</sub> and (*S*-3AEP)Pb<sub>2</sub>I<sub>6</sub>.

| D–H···A                                                                                                                | D–H / Å | H···A / Å | D···A / Å | ∠DHA / ° |
|------------------------------------------------------------------------------------------------------------------------|---------|-----------|-----------|----------|
| <b>(<i>R</i>-3AEP)Pb<sub>2</sub>I<sub>6</sub>-245 K</b>                                                                |         |           |           |          |
| N(1)–H(1A)···I(5) <sup>i</sup>                                                                                         | 0.90    | 2.90      | 3.66(2)   | 143.5    |
| N(1)–H(1B)···I(3) <sup>ii</sup>                                                                                        | 0.90    | 3.22      | 3.94(2)   | 139.1    |
| N(1)–H(1B)···I(7)                                                                                                      | 0.90    | 3.17      | 3.72(2)   | 121.6    |
| N(2)–H(2B)···I(4) <sup>ii</sup>                                                                                        | 0.87    | 2.85      | 3.674(9)  | 158.4    |
| C(1)–H(1E)···I(8) <sup>iii</sup>                                                                                       | 0.97    | 3.19      | 4.03(2)   | 146.5    |
| C(2)–H(2A)···I(4) <sup>i</sup>                                                                                         | 0.99    | 3.17      | 4.16(2)   | 176.9    |
| C(5)–H(5)···I(9) <sup>iii</sup>                                                                                        | 0.94    | 3.17      | 3.929(10) | 138.7    |
| C(6)–H(6)···I(4) <sup>iii</sup>                                                                                        | 0.94    | 3.20      | 4.115(9)  | 164.3    |
| Symmetry codes: (i) 1–X, 1–Y, –1/2+Z; (ii) 1/2+X, 1/2–Y, 1–Z; (iii) 1/2+X, 1/2+Y, +Z.                                  |         |           |           |          |
| <b>(<i>S</i>-3AEP)Pb<sub>2</sub>I<sub>6</sub>-240 K</b>                                                                |         |           |           |          |
| C(1)–H(1B)···I(4) <sup>ii</sup>                                                                                        | 0.96    | 3.24      | 4.06(3)   | 144.6    |
| C(2)–H(2)···I(4) <sup>i</sup>                                                                                          | 0.98    | 3.15      | 4.12(2)   | 177.6    |
| C(5)–H(5)···I(9) <sup>iv</sup>                                                                                         | 0.93    | 3.16      | 3.923(12) | 140.6    |
| C(6)–H(6)···I(4) <sup>iv</sup>                                                                                         | 0.93    | 3.19      | 4.097(10) | 165.7    |
| N(1)–H(1D)···I(9) <sup>v</sup>                                                                                         | 0.89    | 3.16      | 3.96(3)   | 150.4    |
| N(1)–H(1E)···I(6) <sup>i</sup>                                                                                         | 0.89    | 3.11      | 3.69(3)   | 124.1    |
| N(1)–H(1F)···I(2)                                                                                                      | 0.89    | 3.27      | 3.78(3)   | 118.8    |
| N(2)–H(2A)···I(4) <sup>iii</sup>                                                                                       | 0.86    | 2.87      | 3.671(11) | 156.5    |
| Symmetry codes: (i) x+1, y, z; (ii) –x+1, y–1/2, –z; (iii) –x+1, y–1/2, –z+1; (iv) –x, y–1/2, –z+1; (v) –x, y–1/2, –z. |         |           |           |          |

**Table S3.** Crystallographic data and refinement parameters for (*R*-3AEP)Pb<sub>2</sub>I<sub>6</sub>

|                                                                                                       | 240 K                                                                        | 298 K                                                                        | 425 K                                                                        |
|-------------------------------------------------------------------------------------------------------|------------------------------------------------------------------------------|------------------------------------------------------------------------------|------------------------------------------------------------------------------|
| Formula                                                                                               | C <sub>7</sub> H <sub>12</sub> N <sub>2</sub> Pb <sub>2</sub> I <sub>6</sub> | C <sub>7</sub> H <sub>12</sub> N <sub>2</sub> Pb <sub>2</sub> I <sub>6</sub> | C <sub>7</sub> H <sub>12</sub> N <sub>2</sub> Pb <sub>2</sub> I <sub>6</sub> |
| Formula weight                                                                                        | 1299.97                                                                      | 1299.97                                                                      | 1299.97                                                                      |
| Crystal system                                                                                        | Orthorhombic                                                                 | Orthorhombic                                                                 | Orthorhombic                                                                 |
| space group                                                                                           | <i>C</i> 222 <sub>1</sub>                                                    | <i>C</i> 222 <sub>1</sub>                                                    | <i>C</i> 222                                                                 |
| <i>a</i> / Å                                                                                          | 12.9493(3)                                                                   | 12.9629(3)                                                                   | 9.4786(5)                                                                    |
| <i>b</i> / Å                                                                                          | 18.7108(5)                                                                   | 18.7955(5)                                                                   | 17.723(10)                                                                   |
| <i>c</i> / Å                                                                                          | 17.6439(5)                                                                   | 17.6714(5)                                                                   | 6.5033(4)                                                                    |
| $\alpha$ / °                                                                                          | 90                                                                           | 90                                                                           | 90                                                                           |
| $\beta$ / °                                                                                           | 90                                                                           | 90                                                                           | 90                                                                           |
| $\gamma$ / °                                                                                          | 90                                                                           | 90                                                                           | 90                                                                           |
| <i>V</i> / Å <sup>3</sup>                                                                             | 4274.97(13)                                                                  | 4305.53(19)                                                                  | 1092.50(11)                                                                  |
| <i>Z</i>                                                                                              | 8                                                                            | 8                                                                            | 2                                                                            |
| Flack parameter                                                                                       | -0.016(16)                                                                   | -0.019(5)                                                                    | 0.36(4) <sup>d</sup>                                                         |
| <i>D</i> <sub>calc</sub> / g·cm <sup>-3</sup>                                                         | 4.040                                                                        | 4.011                                                                        | 3.952                                                                        |
| $\mu$ / mm <sup>-1</sup>                                                                              | 24.385                                                                       | 24.212                                                                       | 23.855                                                                       |
| total reflns                                                                                          | 19778                                                                        | 59812                                                                        | 12319                                                                        |
| obsd reflns ( <i>I</i> > 2σ( <i>I</i> ))                                                              | 3771                                                                         | 6128                                                                         | 1443                                                                         |
| <i>R</i> <sub>int</sub>                                                                               | 0.038                                                                        | 0.0746                                                                       | 0.0073                                                                       |
| <i>R</i> <sub>1</sub> <sup>a</sup> / <i>wR</i> <sub>2</sub> <sup>b</sup> ( <i>I</i> > 2σ( <i>I</i> )) | 0.0606, 0.1713                                                               | 0.0488, 0.1343                                                               | 0.0327, 0.0723                                                               |
| <i>R</i> <sup>1</sup> / <i>wR</i> <sup>2</sup> (all data)                                             | 0.0692, 0.1785                                                               | 0.0767, 0.1492                                                               | 0.0557, 0.0770                                                               |
| GOF                                                                                                   | 1.064                                                                        | 1.12                                                                         | 1.059                                                                        |
| $\Delta\rho$ <sup>c</sup> / e·Å <sup>-3</sup>                                                         | 5.19/-4.67                                                                   | 3.01/-5.38                                                                   | 1.35/-1.50                                                                   |

<sup>a</sup>  $R_1 = \Sigma | |F_o| - |F_c| | / |F_o|$ . <sup>b</sup>  $wR_2 = [\Sigma w(F_o^2 - F_c^2)^2] / \Sigma w(F_o^2)^2]^{1/2}$ . <sup>c</sup> Maximum and minimum residual electron density. <sup>d</sup> The Flack test results become meaningless as the compounds become weak anomalous scatterers in the high-temperature high-disorder phase.

**Table S4.** Crystallographic data and refinement parameters for (S-3AEP)Pb<sub>2</sub>I<sub>6</sub>

|                                                                                                       | 245 K                                                                        | 298 K                                                                        | 425 K                                                                        |
|-------------------------------------------------------------------------------------------------------|------------------------------------------------------------------------------|------------------------------------------------------------------------------|------------------------------------------------------------------------------|
| Formula                                                                                               | C <sub>7</sub> H <sub>12</sub> N <sub>2</sub> Pb <sub>2</sub> I <sub>6</sub> | C <sub>7</sub> H <sub>12</sub> N <sub>2</sub> Pb <sub>2</sub> I <sub>6</sub> | C <sub>7</sub> H <sub>12</sub> N <sub>2</sub> Pb <sub>2</sub> I <sub>6</sub> |
| Formula weight                                                                                        | 1299.97                                                                      | 1299.97                                                                      | 1299.97                                                                      |
| Crystal system                                                                                        | Orthorhombic                                                                 | Orthorhombic                                                                 | Orthorhombic                                                                 |
| space group                                                                                           | C222 <sub>1</sub>                                                            | C222 <sub>1</sub>                                                            | C222                                                                         |
| <i>a</i> / Å                                                                                          | 12.9335(5)                                                                   | 12.9621(7)                                                                   | 9.4743(7)                                                                    |
| <i>b</i> / Å                                                                                          | 18.7439(8)                                                                   | 18.7875(13)                                                                  | 17.730(12)                                                                   |
| <i>c</i> / Å                                                                                          | 17.6358(8)                                                                   | 17.6666(9)                                                                   | 6.5088(4)                                                                    |
| <i>α</i> / °                                                                                          | 90                                                                           | 90                                                                           | 90                                                                           |
| <i>β</i> / °                                                                                          | 90                                                                           | 90                                                                           | 90                                                                           |
| <i>γ</i> / °                                                                                          | 90                                                                           | 90                                                                           | 90                                                                           |
| <i>V</i> / Å <sup>3</sup>                                                                             | 4273.3(3)                                                                    | 4302.3(4)                                                                    | 1093.35(13)                                                                  |
| <i>Z</i>                                                                                              | 8                                                                            | 8                                                                            | 2                                                                            |
| Flack parameter                                                                                       | -0.01(4)                                                                     | 0.41(2) <sup>d</sup>                                                         | 0.52(5) <sup>d</sup>                                                         |
| <i>D</i> <sub>calc</sub> / g·cm <sup>-3</sup>                                                         | 4.041                                                                        | 4.011                                                                        | 3.949                                                                        |
| <i>μ</i> / mm <sup>-1</sup>                                                                           | 24.395                                                                       | 24.230                                                                       | 23.836                                                                       |
| total reflns                                                                                          | 15592                                                                        | 11819                                                                        | 6242                                                                         |
| obsd reflns ( <i>I</i> > 2σ( <i>I</i> ))                                                              | 5320                                                                         | 5064                                                                         | 1443                                                                         |
| <i>R</i> <sub>int</sub>                                                                               | 0.066                                                                        | 0.025                                                                        | 0.0073                                                                       |
| <i>R</i> <sub>1</sub> <sup>a</sup> / <i>wR</i> <sub>2</sub> <sup>b</sup> ( <i>I</i> > 2σ( <i>I</i> )) | 0.0684, 0.1748                                                               | 0.0424, 0.0952                                                               | 0.0414, 0.1052                                                               |
| <i>R</i> <sup>1</sup> / <i>wR</i> <sup>2</sup> (all data)                                             | 0.0900, 0.1865                                                               | 0.0791, 0.1058                                                               | 0.0566, 0.1096                                                               |
| GOF                                                                                                   | 1.02                                                                         | 1.075                                                                        | 1.107                                                                        |
| Δρ <sup>c</sup> / e·Å <sup>-3</sup>                                                                   | 4.88/-4.82                                                                   | 1.96/-2.71                                                                   | 1.82/-1.74                                                                   |

<sup>a</sup>  $R_1 = \sum | |F_o| - |F_c| | / \sum |F_o|$ . <sup>b</sup>  $wR_2 = [\sum w(F_o^2 - F_c^2)^2] / \sum w(F_o^2)^2]^{1/2}$ . <sup>c</sup> Maximum and minimum residual electron density. <sup>d</sup> The Flack test results become meaningless as the compounds become weak anomalous scatterers in the high-temperature high-disorder phase.



**Table S5.** Bond angles and bond lengths of (*R*-3AEP)Pb<sub>2</sub>I<sub>6</sub> and (*S*-3AEP)Pb<sub>2</sub>I<sub>6</sub>.

| Bond angles                                           | Angle / °  | Bond lengths              | Length / Å |
|-------------------------------------------------------|------------|---------------------------|------------|
| <i>(R</i> -3AEP)Pb <sub>2</sub> I <sub>6</sub> -245 K |            |                           |            |
| Pb(1)–I(1)–Pb(1) <sup>i</sup>                         | 163.50(8)  | I(1)–Pb(1)                | 3.1766(6)  |
| Pb(1) <sup>ii</sup> –I(2)–Pb(1)                       | 93.69(5)   | I(1)–Pb(1) <sup>i</sup>   | 3.1767(6)  |
| Pb(1) <sup>ii</sup> –I(3)–Pb(1)                       | 90.59(5)   | I(2)–Pb(1) <sup>ii</sup>  | 3.1451(12) |
| Pb(2) <sup>iii</sup> –I(4)–Pb(1)                      | 172.33(4)  | I(2)–Pb(1)                | 3.1451(12) |
| Pb(2)–I(5)–Pb(1)                                      | 171.70(4)  | I(3)–Pb(1) <sup>ii</sup>  | 3.2282(14) |
| Pb(2)–I(6)–Pb(2) <sup>iv</sup>                        | 169.16(11) | I(3)–Pb(1)                | 3.2282(14) |
| Pb(2) <sup>v</sup> –I(7)–Pb(2)                        | 88.23(4)   | I(4)–Pb(1)                | 3.2418(14) |
| Pb(2) <sup>v</sup> –I(8)–Pb(2)                        | 91.33(4)   | I(4)–Pb(2) <sup>iii</sup> | 3.2281(14) |
| Pb(2)–I(9)–Pb(1) <sup>iii</sup>                       | 165.91(6)  | I(5)–Pb(1)                | 3.2233(16) |
| I(1)–Pb(1)–I(3)                                       | 170.70(9)  | I(5)–Pb(2)                | 3.1315(15) |
| I(1)–Pb(1)–I(4)                                       | 85.91(5)   | I(6)–Pb(2) <sup>iv</sup>  | 3.1983(6)  |
| I(1)–Pb(1)–I(5)                                       | 98.09(4)   | I(6)–Pb(2)                | 3.1983(6)  |
| I(1)–Pb(1)–I(9) <sup>vi</sup>                         | 91.83(5)   | I(7)–Pb(2) <sup>v</sup>   | 3.2455(13) |
| I(2)–Pb(1)–I(1)                                       | 89.09(2)   | I(7)–Pb(2)                | 3.2455(13) |
| I(2)–Pb(1)–I(3)                                       | 87.86(3)   | I(8)–Pb(2) <sup>v</sup>   | 3.1584(13) |
| I(2)–Pb(1)–I(4)                                       | 89.78(2)   | I(8)–Pb(2)                | 3.1584(13) |
| I(2)–Pb(1)–I(5)                                       | 171.76(5)  | I(9)–Pb(1) <sup>iii</sup> | 3.2822(16) |
| I(2)–Pb(1)–I(9) <sup>vi</sup>                         | 88.52(3)   | I(9)–Pb(2)                | 3.2614(15) |
| I(3)–Pb(1)–I(4)                                       | 85.29(2)   |                           |            |
| I(3)–Pb(1)–I(9) <sup>vi</sup>                         | 96.86(3)   |                           |            |
| I(4)–Pb(1)–I(9) <sup>vi</sup>                         | 177.19(3)  |                           |            |
| I(5)–Pb(1)–I(3)                                       | 84.42(4)   |                           |            |
| I(5)–Pb(1)–I(4)                                       | 86.73(6)   |                           |            |
| I(5)–Pb(1)–I(9) <sup>vi</sup>                         | 95.26(6)   |                           |            |
| I(4) <sup>vi</sup> –Pb(2)–I(7)                        | 91.62(2)   |                           |            |
| I(4) <sup>vi</sup> –Pb(2)–I(9)                        | 176.08(4)  |                           |            |
| I(5)–Pb(2)–I(4) <sup>vi</sup>                         | 92.17(6)   |                           |            |
| I(5)–Pb(2)–I(6)                                       | 92.09(4)   |                           |            |

|                               |           |
|-------------------------------|-----------|
| I(5)–Pb(2)–I(7)               | 176.00(6) |
| I(5)–Pb(2)–I(8)               | 91.25(4)  |
| I(5)–Pb(2)– I (9)             | 89.25(2)  |
| I(6)–Pb(2)–I(4) <sup>vi</sup> | 88.04(5)  |
| I(6)–Pb(2)–I(7)               | 86.74(2)  |
| I(6)–Pb(2)–I(9)               | 88.26(6)  |
| I(7)–Pb(2)–I(9)               | 86.88(3)  |
| I(8)–Pb(2)–I(4) <sup>vi</sup> | 87.50(2)  |
| I(8)–Pb(2)–I(6)               | 174.53(5) |
| I(8)–Pb(2)–I(7)               | 90.22(3)  |
| I(8)–Pb(2)–I(9)               | 96.12(3)  |

Symmetry codes:(i): +X, –Y, 1–Z; (ii) 1–X, +Y, 3/2–Z; (iii) –1/2+X, 1/2–Y, 1–Z;  
(iv) 1+X, 1–Y, 1–Z; (v) 1–X, +Y, 1/2–Z; (vi) 1/2+X, 1/2–Y, 1–Z.

*(R-3AEP)Pb<sub>2</sub>I<sub>6</sub>-298 K*

|                                             |            |                           |            |
|---------------------------------------------|------------|---------------------------|------------|
| I(1)–Pb(1)–I(2)                             | 88.73(2)   | I(1)–Pb(1)                | 3.1641(11) |
| I(1)–Pb(1)–I(3)                             | 88.68(2)   | I(2)–Pb(1)                | 3.1822(6)  |
| I(1)–Pb(1)–I(4)                             | 90.259(18) | I(3)–Pb(1)                | 3.2771(13) |
| I(1)–Pb(1)–I(5)                             | 87.70(3)   | I(4)–Pb(1)                | 3.2402(12) |
| I(1)–Pb(1)–I(6)                             | 173.48(4)  | I(5)–Pb(1)                | 3.2178(12) |
| I(2)–Pb(1)–I(3)                             | 91.40(4)   | I(6)–Pb(1)                | 3.2025(15) |
| I(2)–Pb(1)–I(4)                             | 86.73(4)   | I(3) <sup>ii</sup> –Pb(2) | 3.2695(12) |
| I(2)–Pb(1)–I(5)                             | 171.85(4)  | I(4) <sup>ii</sup> –Pb(2) | 3.2258(12) |
| I(2)–Pb(1)–I(6)                             | 97.43(4)   | I(6)–Pb(2)                | 3.1503(14) |
| I(4)–Pb(1)–I(3)                             | 177.87(3)  | I(7)–Pb(2)                | 3.1733(11) |
| I(5)–Pb(1)–I(3)                             | 95.84(3)   | I(8)–Pb(2)                | 3.1926(5)  |
| I(5)–Pb(1)–I(4)                             | 85.96(19)  | I(9)–Pb(2)                | 3.2281(12) |
| I(6)–Pb(1)–I(3)                             | 93.29(5)   |                           |            |
| I(6)–Pb(1)–I(4)                             | 87.96(5)   |                           |            |
| I(6)–Pb(1)–I(5)                             | 85.92(3)   |                           |            |
| I(4) <sup>i</sup> –Pb(2)–I(3) <sup>ii</sup> | 177.27(3)  |                           |            |

|                                  |            |
|----------------------------------|------------|
| I(4) <sup>i</sup> –Pb(2)–I(9)    | 91.666(19) |
| I(6)–Pb(2)–I(3) <sup>ii</sup>    | 89.96(6)   |
| I(6)–Pb(2)–I(4) <sup>i</sup>     | 90.70(5)   |
| I(6)–Pb(2)–I(7)                  | 89.84(3)   |
| I(6)–Pb(2)–I(8)                  | 93.66(4)   |
| I(6)–Pb(2)–I(9)                  | 177.50(5)  |
| I(7)–Pb(2)–I(3) <sup>ii</sup>    | 95.24(3)   |
| I(7)–Pb(2)–I(4) <sup>i</sup>     | 87.409(19) |
| I(7)–Pb(2)–I(8)                  | 174.69(6)  |
| I(7)–Pb(2)–I(9)                  | 89.43(3)   |
| I(8)–Pb(2)–I(3) <sup>ii</sup>    | 88.76(5)   |
| I(8)–Pb(2)–I(4) <sup>i</sup>     | 88.56(5)   |
| I(8)–Pb(2)–I(9)                  | 87.24(2)   |
| I(9)–Pb(2)–I(3) <sup>ii</sup>    | 87.72(2)   |
| Pb(1)–I(1)–Pb(1) <sup>iii</sup>  | 93.30(8)   |
| Pb(1) <sup>iv</sup> –I(2)–Pb(1)  | 165.83(5)  |
| Pb(1) <sup>ii</sup> –I(3)–Pb(1)  | 167.91(5)  |
| Pb(2) <sup>iii</sup> –I(4)–Pb(1) | 172.67(3)  |
| Pb(2)–I(5)–Pb(1) <sup>iii</sup>  | 91.30(4)   |
| Pb(2)–I(6)–Pb(1)                 | 175.30(8)  |
| Pb(2) <sup>v</sup> –I(7)–Pb(2)   | 91.56(4)   |
| Pb(2)–I(8)–Pb(2) <sup>vi</sup>   | 170.28(9)  |
| Pb(2) <sup>v</sup> –I(9)–Pb(2)   | 89.58(4)   |

Symmetry codes:(i) 1/2+X, 1/2–Y, 1–Z; (ii) –1/2+X, 1/2–Y, 1–Z; (iii) 1–X, +Y, 3/2–Z; (iv) +X, –Y, 1–Z; (v) 1–X, +Y, 1/2–Z; (vi) +X, 1–Y, 1–Z.

(*R*-3AEP)Pb<sub>2</sub>I<sub>6</sub>-425 K

|                                |           |                          |             |
|--------------------------------|-----------|--------------------------|-------------|
| I(1)–Pb(1)–I(1) <sup>i</sup>   | 179.28(5) | Pb(1)–I(1)               | 3.2517(2)   |
| I(2) <sup>ii</sup> –Pb(1)–I(1) | 90.8(2)   | Pb(1)–I(1) <sup>i</sup>  | 3.25171(19) |
| I(2)–Pb(1)–I(1) <sup>i</sup>   | 90.8(2)   | Pb(1)–I(2) <sup>ii</sup> | 3.1813(4)   |
| I(2)–Pb(1)–I(1)                | 88.7(2)   | Pb(1)–I(2)               | 3.1813(4)   |

|                                               |            |                           |           |
|-----------------------------------------------|------------|---------------------------|-----------|
| I(2) <sup>ii</sup> -Pb(1)-I(1) <sup>i</sup>   | 88.7(2)    | Pb(1)-I(3)                | 3.1984(7) |
| I(2)-Pb(1)-I(2) <sup>ii</sup>                 | 96.333(16) | Pb(1)-I(3) <sup>iii</sup> | 3.1984(7) |
| I(2) <sup>ii</sup> -Pb(1)-I(3)                | 88.055(14) |                           |           |
| I(2) <sup>ii</sup> -Pb(1)-I(3) <sup>iii</sup> | 175.51(6)  |                           |           |
| I(2)-Pb(1)-I(3)                               | 175.51(6)  |                           |           |
| I(2)-Pb(1)-I(3) <sup>iii</sup>                | 88.055(14) |                           |           |
| I(3) <sup>iii</sup> -Pb(1)-I(1) <sup>i</sup>  | 90.259(17) |                           |           |
| I(3)-Pb(1)-I(1)                               | 90.259(17) |                           |           |
| I(3)-Pb(1)-I(1) <sup>i</sup>                  | 90.259(17) |                           |           |
| I(3) <sup>iii</sup> -Pb(1)-I(1)               | 90.259(17) |                           |           |
| I(3) <sup>iii</sup> -Pb(1)-I(3)               | 87.58(3)   |                           |           |
| Pb(1) <sup>iv</sup> -I(1)-Pb(1) <sup>i</sup>  | 179.28(5)  |                           |           |
| Pb(1)-I(2)-Pb(1) <sup>iv</sup>                | 177.9(4)   |                           |           |
| Pb(1) <sup>iii</sup> -I(3)-Pb(1)              | 92.42(3)   |                           |           |

Symmetry codes:(i) 1-X,1-Y,+Z; (ii) +X, +Y, 1+Z; (iii) 1-X, +Y, 1-Z;(iv) +X, +Y, 1+Z; (v) 3/2-X, 3/2-Y, +Z.

(S-3AEP)Pb<sub>2</sub>I<sub>6</sub>-245 K

|                                  |            |                           |            |
|----------------------------------|------------|---------------------------|------------|
| Pb(1)-I(1)-Pb(1) <sup>i</sup>    | 163.50(8)  | I(1)-Pb(1)                | 3.2253(16) |
| Pb(1) <sup>ii</sup> -I(2)-Pb(1)  | 93.69(5)   | I(1)-Pb(1) <sup>i</sup>   | 3.2253(16) |
| Pb(1) <sup>ii</sup> -I(3)-Pb(1)  | 90.59(5)   | I(2)-Pb(1)                | 3.1494(15) |
| Pb(2) <sup>iii</sup> -I(4)-Pb(1) | 172.33(4)  | I(2)-Pb(1) <sup>i</sup>   | 3.1495(15) |
| Pb(2)-I(5)-Pb(1)                 | 171.70(4)  | I(3)-Pb(1)                | 3.1763(8)  |
| Pb(2)-I(6)-Pb(2) <sup>iv</sup>   | 169.16(11) | I(3)-Pb(1) <sup>ii</sup>  | 3.1763(8)  |
| Pb(2) <sup>v</sup> -I(7)-Pb(2)   | 88.23(4)   | I(4)-Pb(1)                | 3.2370(19) |
| Pb(2) <sup>v</sup> -I(8)-Pb(2)   | 91.33(4)   | I(4)-Pb(2) <sup>iii</sup> | 3.2238(19) |
| Pb(2)-I(9)-Pb(1) <sup>iii</sup>  | 165.91(6)  | I(5)-Pb(1)                | 3.221(2)   |
| I(1)-Pb(1)-I(3)                  | 170.70(9)  | I(5)-Pb(2)                | 3.1302(19) |
| I(1)-Pb(1)-I(4)                  | 85.91(5)   | I(6)-Pb(2)                | 3.1604(16) |
| I(1)-Pb(1)-I(5)                  | 98.09(4)   | I(6)-Pb(2) <sup>iv</sup>  | 3.1604(16) |
| I(1)-Pb(1)-I(9) <sup>vi</sup>    | 91.83(5)   | I(7)-Pb(2)                | 3.2395(16) |

|                                  |           |                           |            |
|----------------------------------|-----------|---------------------------|------------|
| I(2)–Pb(1)– I (1)                | 89.09(2)  | I(7)–Pb(2) <sup>iv</sup>  | 3.2396(16) |
| I(2)–Pb(1)–I(3)                  | 87.86(3)  | I(8)–Pb(2)                | 3.1945(7)  |
| I(2)–Pb(1)–I(4)                  | 89.78(2)  | I(8)–Pb(2) <sup>v</sup>   | 3.1946(7)  |
| I(2)–Pb(1)–I(5)                  | 171.76(5) | I(9)–Pb(1) <sup>iii</sup> | 3.270(2)   |
| I(2)–Pb(1)–I(9) <sup>vi</sup>    | 88.52(3)  | I(9)–Pb(2)                | 3.262(2)   |
| I(3)–Pb(1)–I(4)                  | 85.29(2)  |                           |            |
| I(3)–Pb(1)–I(9) <sup>vi</sup>    | 96.86(3)  |                           |            |
| I(4)–Pb(1)–I(9) <sup>vi</sup>    | 177.19(3) |                           |            |
| I(5)–Pb(1)–I(3)                  | 84.42(4)  |                           |            |
| I(5)–Pb(1)–I(4)                  | 86.73(6)  |                           |            |
| I(5)–Pb(1)– I (9) <sup>vi</sup>  | 95.26(6)  |                           |            |
| I(4) <sup>vi</sup> –Pb(2)– I (7) | 91.62(2)  |                           |            |
| I(4) <sup>vi</sup> –Pb(2)–I(9)   | 176.08(4) |                           |            |
| I(5)–Pb(2)–I(4) <sup>vi</sup>    | 92.17(6)  |                           |            |
| I(5)–Pb(2)–I(6)                  | 92.09(4)  |                           |            |
| I(5)–Pb(2)–I(7)                  | 176.00(6) |                           |            |
| I(5)–Pb(2)–I(8)                  | 91.25(4)  |                           |            |
| I(5)–Pb(2)– I (9)                | 89.25(2)  |                           |            |
| I(6)–Pb(2)–I(4) <sup>vi</sup>    | 88.04(5)  |                           |            |
| I(6)–Pb(2)–I(7)                  | 86.74(2)  |                           |            |
| I(6)–Pb(2)–I(9)                  | 88.26(6)  |                           |            |
| I(7)–Pb(2)–I(9)                  | 86.88(3)  |                           |            |
| I(8)–Pb(2)–I(4) <sup>vi</sup>    | 87.50(2)  |                           |            |
| I(8)–Pb(2)–I(6)                  | 174.53(5) |                           |            |
| I(8)–Pb(2)–I(7)                  | 90.22(3)  |                           |            |
| I(8)–Pb(2)–I(9)                  | 96.12(3)  |                           |            |

Symmetry codes:(i): 1+X, +Y, 1+Z; (ii) 1–X, 1/2+Y, 1–Z; (iii) 1–X, –1/2+Y, 1–Z;  
(iv) –1+X, +Y, –1+Z

(S-3AEP)Pb<sub>2</sub>I<sub>6</sub>-290 K

|                 |          |            |            |
|-----------------|----------|------------|------------|
| I(1)–Pb(1)–I(4) | 85.44(3) | I(1)–Pb(1) | 3.1641(11) |
|-----------------|----------|------------|------------|

|                                |           |                           |            |
|--------------------------------|-----------|---------------------------|------------|
| I(1)–Pb(1)–I(9) <sup>vi</sup>  | 96.64(4)  | I(2)–Pb(1)                | 3.1822(6)  |
| I(2)–Pb(1)–I(1)                | 87.91(4)  | I(3)–Pb(1)                | 3.2771(13) |
| I(2)–Pb(1)–I(3)                | 88.93(3)  | I(4)–Pb(1)                | 3.2402(12) |
| I(2)–Pb(1)–I(4)                | 89.87(3)  | I(5)–Pb(1)                | 3.2178(12) |
| I(2)–Pb(1)–I(5)                | 172.15(6) | I(6)–Pb(1)                | 3.2025(15) |
| I(2)–Pb(1)–I(9) <sup>vi</sup>  | 88.61(3)  | I(3) <sup>ii</sup> –Pb(2) | 3.2695(12) |
| I(3)–Pb(1)–I(1)                | 170.99(6) | I(4) <sup>ii</sup> –Pb(2) | 3.2258(12) |
| I(3)–Pb(1)–I(4)                | 86.12(6)  | I(6)–Pb(2)                | 3.1503(14) |
| I(3)–Pb(1)–I(5)                | 98.00(5)  | I(7)–Pb(2)                | 3.1733(11) |
| I(3)–Pb(1)–I(9) <sup>vi</sup>  | 91.71(6)  | I(8)–Pb(2)                | 3.1926(5)  |
| I(7)–Pb(1)–I(9) <sup>vi</sup>  | 177.37(4) | I(9)–Pb(2)                | 3.2281(12) |
| I(9)–Pb(1)–I(1)                | 84.69(4)  |                           |            |
| I(9)–Pb(1)–I(4)                | 86.95(8)  |                           |            |
| I(9)–Pb(1)–I(9) <sup>vi</sup>  | 94.83(8)  |                           |            |
| I(4) <sup>vi</sup> –Pb(2)–I(7) | 91.64(3)  |                           |            |
| I(4) <sup>vi</sup> –Pb(2)–I(9) | 176.38(4) |                           |            |
| I(5)–Pb(2)–I(4) <sup>vi</sup>  | 91.85(8)  |                           |            |
| I(5)–Pb(2)–I(6)                | 90.89(5)  |                           |            |
| I(5)–Pb(2)–I(7)                | 176.42(8) |                           |            |
| I(5)–Pb(2)–I(8)                | 92.52(5)  |                           |            |
| I(5)–Pb(2)–I(9)                | 89.41(8)  |                           |            |
| I(6)–Pb(2)–I(4) <sup>vi</sup>  | 87.53(3)  |                           |            |
| I(6)–Pb(2)–I(7) <sup>i</sup>   | 90.03(4)  |                           |            |
| I(6)–Pb(2)–I(8)                | 174.79(6) |                           |            |
| I(6)–Pb(2)–I(9)                | 95.85(4)  |                           |            |
| I(7)–Pb(2)–I(9)                | 87.06(3)  |                           |            |
| I(8)–Pb(2)–I(4) <sup>vi</sup>  | 88.42(7)  |                           |            |
| I(8)–Pb(2)–I(7)                | 86.81(3)  |                           |            |
| I(8)–Pb(2)–I(9)                | 88.13(7)  |                           |            |
| Pb(1) <sup>i</sup> –I(1)–Pb(1) | 90.68(5)  |                           |            |
| Pb(1)–I(2)–Pb(1) <sup>i</sup>  | 93.51(6)  |                           |            |

|                                              |            |
|----------------------------------------------|------------|
| Pb(1)–I(3)–Pb(1) <sup>ii</sup>               | 164.14(11) |
| Pb(2) <sup>iii</sup> –I(4)–Pb(1)             | 172.48(5)  |
| Pb(2)–I(5)–Pb(1)                             | 172.50(12) |
| Pb(2) <sup>iv</sup> –I(6)–Pb(2)              | 91.39(5)   |
| Pb(2) <sup>v</sup> –I(7)–Pb(2) <sup>iv</sup> | 88.56(5)   |
| Pb(2) <sup>v</sup> –I(8)–Pb(2) <sup>v</sup>  | 170.00(14) |
| Pb(2)–I(9)–Pb(1) <sup>iii</sup>              | 166.46(7)  |

Symmetry codes: (i) 1/2+X, 1/2–Y, 1–Z; (ii) –1/2+X, 1/2–Y, 1–Z; (iii) 1–X, +Y, 3/2–Z; (iv) +X, –Y, 1–Z; (v) 1–X, +Y, 1/2–Z; (vi) +X, 1–Y, 1–Z.

(*S*-3AEP)Pb<sub>2</sub>I<sub>6</sub>-425 K

|                                                  |            |                           |            |
|--------------------------------------------------|------------|---------------------------|------------|
| I (1)–Pb(1)– I (1) <sup>i</sup>                  | 87.81(3)   | Pb(1)–I(1)                | 3.2015(9)  |
| I (1) <sup>i</sup> –Pb(1)– I (2)                 | 90.20(2)   | Pb(1)–I(1) <sup>i</sup>   | 3.2015(9)  |
| I (1) <sup>i</sup> –Pb(1)– I (2) <sup>ii</sup>   | 90.20(2)   | Pb(1)–I(2) <sup>ii</sup>  | 3.2544(19) |
| I (1) <sup>iii</sup> –Pb(1)– I (2)               | 90.20(2)   | Pb(1)–I(2)                | 3.2544(19) |
| I (1)–Pb(1)– I (2)                               | 90.20(2)   | Pb(1)–I(3)                | 3.1827(4)  |
| I (2) <sup>ii</sup> –Pb(1)– I (2) <sup>i</sup>   | 179.46(6)  | Pb(1)–I(3) <sup>iii</sup> | 3.2015(4)  |
| I (3) <sup>iii</sup> –Pb(1)– I (1)               | 175.82(2)  |                           |            |
| I (3)–Pb(1)– I (1) <sup>i</sup>                  | 175.82(2)  |                           |            |
| I (3) <sup>–</sup> –Pb(1)– I (1)                 | 88.003(17) |                           |            |
| I (3) <sup>iii</sup> –Pb(1)– I (1)               | 88.003(17) |                           |            |
| I (3)–Pb(1)– I (2) <sup>ii</sup>                 | 89.8(3)    |                           |            |
| I (3) <sup>iii</sup> –Pb(1)– I (2) <sup>ii</sup> | 89.8(3)    |                           |            |
| I (3) <sup>iii</sup> –Pb(1)– I (2)               | 89.8(3)    |                           |            |
| I (3)–Pb(1)– I (2)                               | 89.8(3)    |                           |            |
| I(3)–Pb(1)–I(3) <sup>iii</sup>                   | 96.180(17) |                           |            |
| Pb(1) <sup>ii</sup> –I(1)–Pb(1) <sup>i</sup>     | 92.19(3)   |                           |            |
| Pb(1)– I (2)–Pb(1) <sup>iv</sup>                 | 179.46(6)  |                           |            |
| Pb(1) <sup>ii</sup> – I (3)–Pb(1) <sup>v</sup>   | 179.9(5)   |                           |            |

Symmetry codes: 1–X, 1–Y, +Z; (ii) +X, Y, 1+Z; (iii) 1–X, +Y, –1–Z.

**Table S6.** Summary of the chiroptical properties of chiral lead halide-based semiconductors.

| Dimension    | Compound                                                                                                | $g_{CD}$             | $g_{lph}$            | $R$<br>(A/W)         | $D^*$<br>(Jones)     | $\lambda$<br>(nm) | Ref (DOI)                     |
|--------------|---------------------------------------------------------------------------------------------------------|----------------------|----------------------|----------------------|----------------------|-------------------|-------------------------------|
| 1D           | ( <i>R/S</i> -PEA)PbI <sub>3</sub>                                                                      | $1.9 \times 10^{-2}$ | $9.7 \times 10^{-2}$ | $1.2 \times 10^{-1}$ | $7.1 \times 10^{11}$ | 395               | 10.1038/s41467-019-09942-z    |
|              | ( <i>R/S</i> -1/2-NEA)PbI <sub>3</sub>                                                                  | NA                   | $2.9 \times 10^{-1}$ | $9 \times 10^{-2}$   | $3.8 \times 10^{11}$ | 405               | 10.1021/acs.chemmater.1c03622 |
| 2D           | ( <i>R/S</i> -MBA) <sub>2</sub> PbI <sub>4</sub>                                                        | 0.004                | $1.0 \times 10^{-1}$ | NA                   | NA                   | 486               | 10.1021/acsnano.0c05980       |
|              | ( <i>R/S</i> -BPEA) <sub>2</sub> PbI <sub>4</sub>                                                       | $2.0 \times 10^{-3}$ | $1.3 \times 10^{-1}$ | $2.1 \times 10^{-3}$ | $3 \times 10^{11}$   | 520               | 10.1021/jacs.1c07183          |
|              | ( <i>R/S</i> -3AMP)PbBr <sub>4</sub>                                                                    | $1.8 \times 10^{-3}$ | $2.0 \times 10^{-1}$ | $4.2 \times 10^{-2}$ | $1.2 \times 10^{12}$ | 430               | 10.1002/adma.202204119        |
|              | ( <i>R/S</i> -VPEA) <sub>2</sub> PbI <sub>4</sub>                                                       | NA                   | $2.2 \times 10^{-1}$ | 1.6                  | $2.2 \times 10^{13}$ | 490               | 10.1002/adfm.202306199        |
| 2D Nanowires | ( <i>R/S</i> -MBA) <sub>2</sub> PbI <sub>4</sub>                                                        | NA                   | $1.5 \times 10^{-1}$ | 47.1                 | $1.2 \times 10^{13}$ | 505               | 10.1021/jacs.1c02675          |
| Quasi-2D     | ( <i>S/R</i> -2-NEA)MAPb <sub>2</sub> I <sub>7</sub>                                                    | $5 \times 10^{-3}$   | $1.5 \times 10^{-1}$ | 15.7                 | NA                   | 405               | 10.1021/acsnano.1c09521       |
| 3D           | ( <i>R/S</i> -BPEA)EA <sub>6</sub> Pb <sub>4</sub> Cl <sub>15</sub><br>(Cavity formed by six octahedra) | $7.6 \times 10^{-5}$ | $2.8 \times 10^{-1}$ | $1.8 \times 10^{-3}$ | $4.7 \times 10^{10}$ | 320               | 10.1002/anie.202307034        |
|              | ( <i>R/S</i> -3AEP)Pb <sub>2</sub> I <sub>6</sub><br>(Cavity formed by two octahedra)                   | $4.1 \times 10^{-6}$ | $8.0 \times 10^{-2}$ | 0.25                 | $3.2 \times 10^{12}$ | 565               | Our work                      |

Note: PEA and MBA = phenylethylammonium, 1/2-NEA = 1/2-(naphthyl)ethylammonium, BPEA = 1-(4-bromophenyl)ethylammonium; MA = methylammonium, 3AMP = 3-(aminomethyl)-piperidine divalent cation, VPEA = 1-(4-vinylphenyl)ethan ammonium, EA = ethylammonium
